# Supplementary material for: A molecular level understanding of interaction between FTY720 (Fingolimod hydrochloride) and DMPC multilamellar vesicles
Source: Royal Society of Chemistry journal article supplement (doi:10.1039/c4ra02404d), 2014-01-01

## Supporting Information

*Jitendriya Swain, Santosh R Borkar, Indrapal Singh Aidhen and Ashok Kumar Mishra\**  
*Department of Chemistry, Indian Institute of Technology Madras, Chennai 600 036, India*

**Figure SI 1.** Molecular Structure of A) Sphingosine (B) FTY720

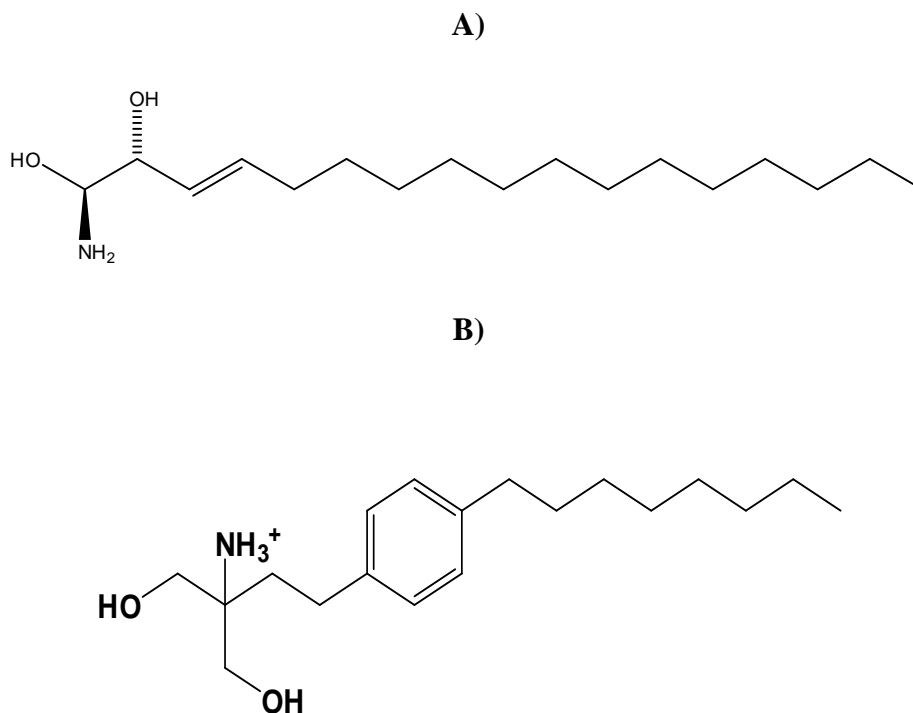

**Figure SI 2.** DLS histogram plot for DMPC MLVs in presence of different mol % of FTY720, ([DMPC] =0.4mM)

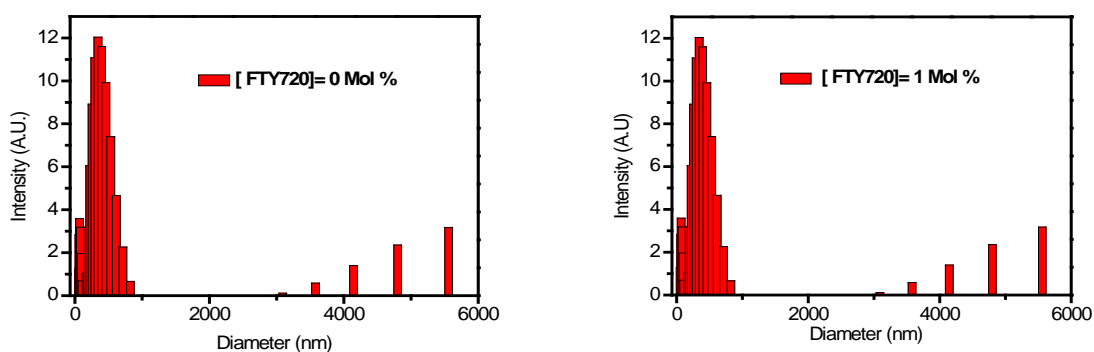

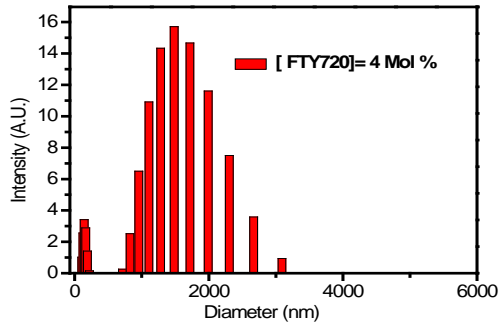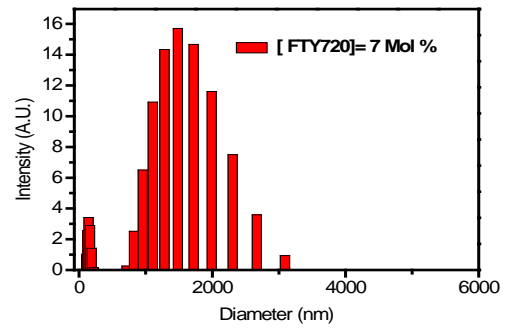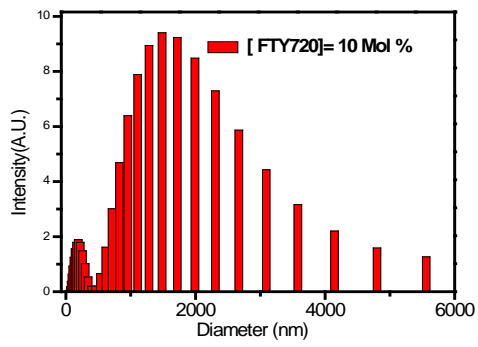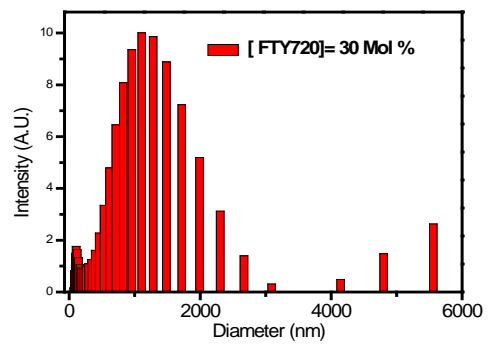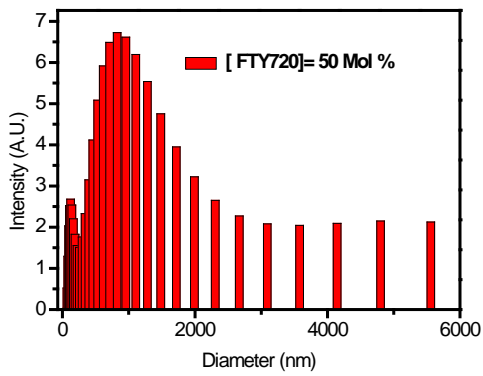

**Figure SI 3.** DLS histograms plot for complex smaller aggregates of DMPC MLVs with increase in mol % FTY720. ([DMPC] =0.4mM)

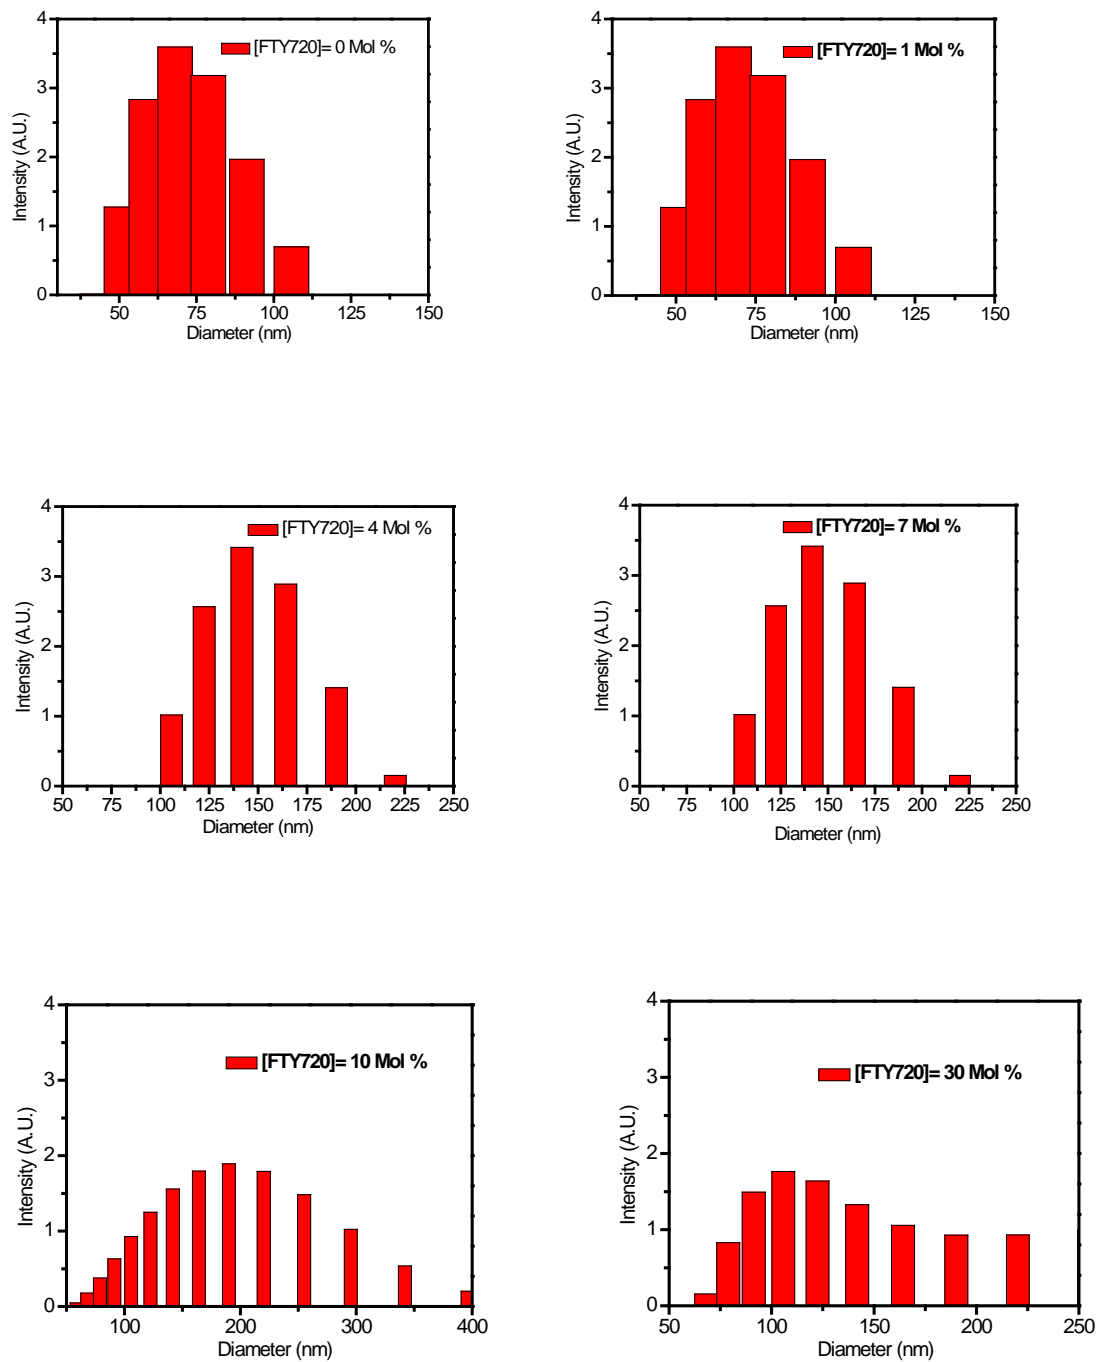

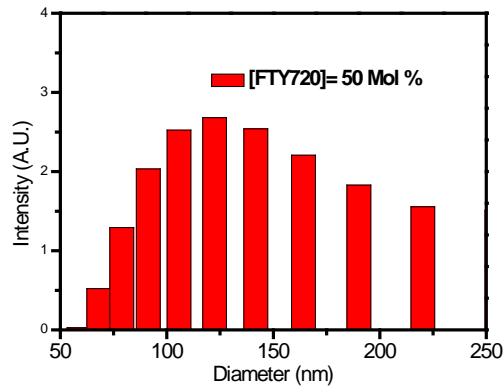

**Figure SI 4:** Emission spectra of 1-naphthol with increase in mol % of FTY720 at (A) 13 °C (SG) and (B) 35 °C (LC) phase of DMPC MLVs. ([DMPC] = 0.4mM, [1-naphthol] = 4 $\mu$ M)

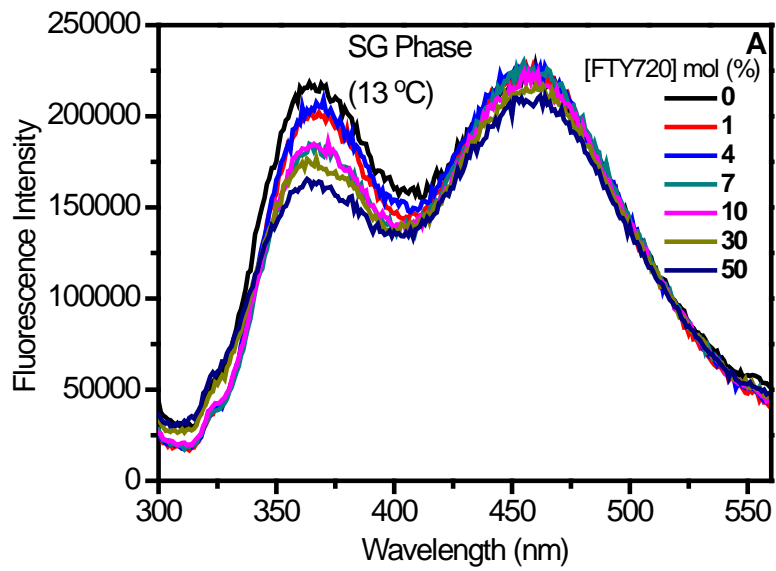

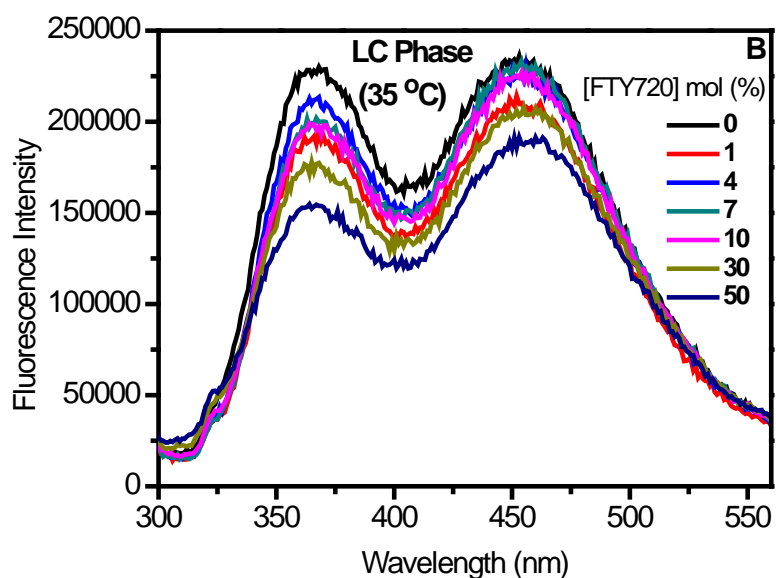

**Table SI 1:** Variation in fluorescence lifetimes and amplitudes of  $\text{NpO}^*$  form with increase in mol % FTY720 for SG (13 °C) and LC phase (35 °C) of DMPC MLVs ( $\lambda_{\text{ex}} = 295 \text{ nm}$ ,  $\lambda_{\text{em}}=460 \text{ nm}$ ). [DMPC] = 0.4 mM, [1-naphthol] = 4  $\mu\text{M}$ . (Error =  $\pm 5 \%$ )

| [FTY720] Mol (%) Em=460 | $\tau_s$ (ns) ( $\alpha_1$ ) | $\tau_1$ (ns) ( $\alpha_2$ ) | $\tau_{\text{avg}}$ (ns) | [FTY720] Mol (%) Em=460 | $\tau_s$ (ns) ( $\alpha_1$ ) | $\tau_1$ (ns)( $\alpha_2$ ) | $\tau_{\text{avg}}$ (ns) |
|-------------------------|------------------------------|------------------------------|--------------------------|-------------------------|------------------------------|-----------------------------|--------------------------|
| <b>13°C (SG Phase)</b>  |                              |                              |                          | <b>35°C (LC Phase)</b>  |                              |                             |                          |
| 0                       | 7.5 <sub>2</sub> (0.72)      | 18.1 <sub>8</sub> (0.28)     | 12.6 <sub>8</sub>        | 0                       | 7.7 <sub>2</sub> (0.54)      | 16.8 <sub>6</sub> (0.46)    | 13.6 <sub>6</sub>        |
| 1                       | 7.5 <sub>0</sub> (0.73)      | 18.1 <sub>6</sub> (0.27)     | 12.5 <sub>3</sub>        | 1                       | 7.7 <sub>0</sub> (0.54)      | 16.8 <sub>2</sub> (0.46)    | 13.6 <sub>3</sub>        |
| 4                       | 7.4 <sub>3</sub> (0.73)      | 17.8 <sub>3</sub> (0.27)     | 12.3 <sub>1</sub>        | 4                       | 7.6 <sub>9</sub> (0.55)      | 16.7 <sub>5</sub> (0.45)    | 13.4 <sub>9</sub>        |
| 7                       | 7.5 <sub>2</sub> (0.74)      | 18.4 <sub>3</sub> (0.26)     | 12.5 <sub>6</sub>        | 7                       | 7.5 <sub>2</sub> (0.53)      | 16.3 <sub>4</sub> (0.47)    | 13.2 <sub>2</sub>        |
| 10                      | 7.4 <sub>1</sub> (0.74)      | 17.1 <sub>1</sub> (0.26)     | 11.7 <sub>5</sub>        | 10                      | 7.6 <sub>2</sub> (0.55)      | 15.7 <sub>5</sub> (0.45)    | 12.7 <sub>2</sub>        |
| 30                      | 7.1 <sub>3</sub> (0.74)      | 15.4 <sub>6</sub> (0.27)     | 10.8 <sub>3</sub>        | 30                      | 7.2 <sub>2</sub> (0.59)      | 13.5 <sub>5</sub> (0.41)    | 10.8 <sub>0</sub>        |
| 50                      | 7.0 <sub>9</sub> (0.72)      | 14.7 <sub>9</sub> (0.28)     | 10.5 <sub>3</sub>        | 50                      | 6.1 <sub>5</sub> (0.52)      | 11.3 <sub>1</sub> (0.48)    | 9.3 <sub>9</sub>         |

**Figure SI 5:** Response of the fluorescence intensity of DPH in water with increase in mol % FTY720 ( $\lambda_{\text{ex}} = 370 \text{ nm}$ ,  $[\text{DPH}] = 4 \mu\text{M}$ ).

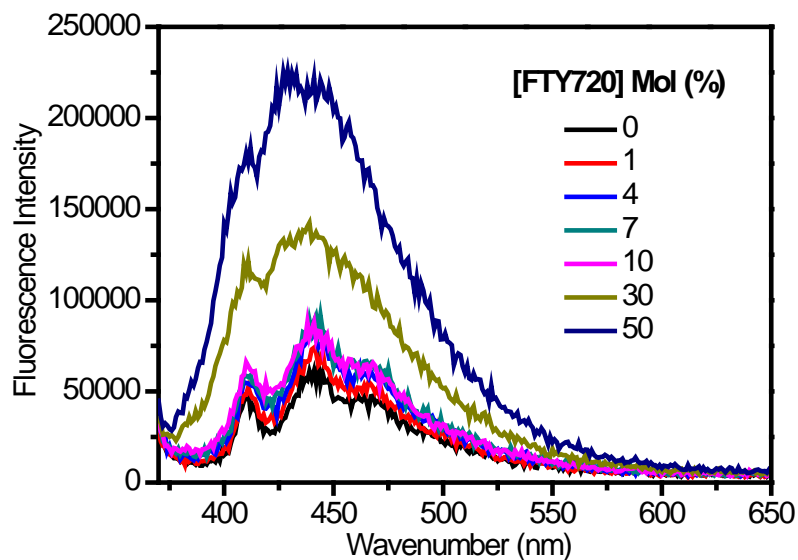

**Figure SI 6:** Fluorescence anisotropy plot of DPH in DMPC MLVs and in water with increase in mol % of FTY720 at  $13^\circ \text{C}$  ( $\lambda_{\text{ex}} = 370 \text{ nm}$ ,  $[\text{DMPC}] = 0.4 \text{ mM}$ ,  $[\text{DPH}] = 4 \mu\text{M}$ ).

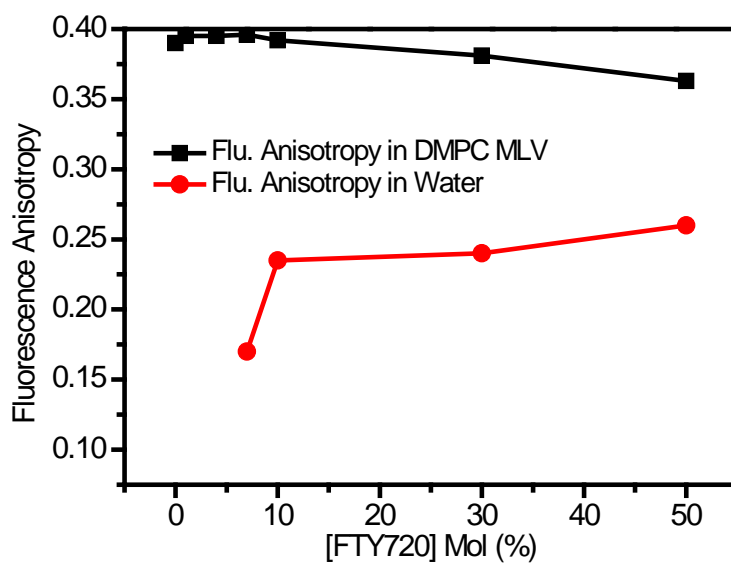

Supplement: c4ra02404d1.pdf [file c4ra02404d1.pdf]
